# Supplementary material
Source: publisher site journal article supplement (https://www.dovepress.com/article/supplementary_file/536454/536454%20Supplementary%20file.docx)
Supplement: Supplementary file 1 [file 536454%20Supplementary%20file.docx]

**Supplementary Material**

**
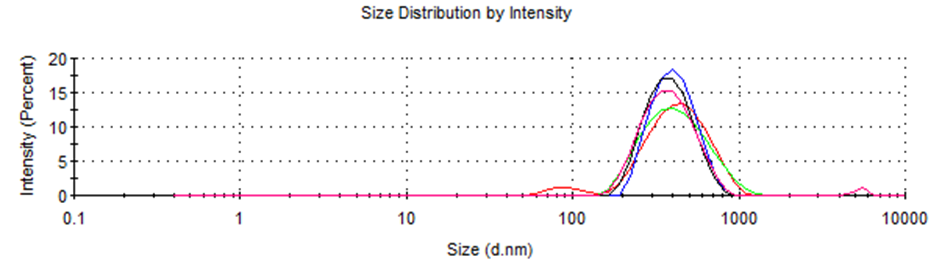
**

**Supplementary Figure 1** Zetasizer dynamic light scattering (DLS) size measurement of KM encapsulated Pea Protein Nanoparticles by Berry Extract crosslinking (KM-PP-BE-NP)


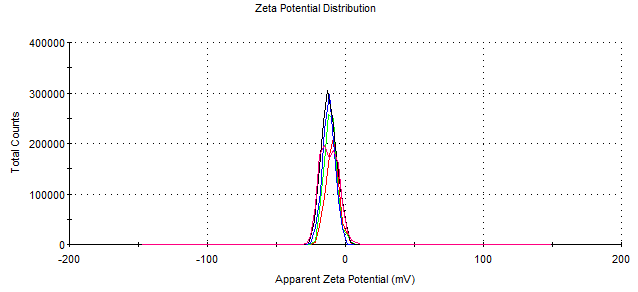


**Supplementary Figure 2** Zetasizer dynamic light scattering (DLS) zeta potential (ZP) measurement of KM encapsulated Pea Protein Nanoparticles by Berry Extract crosslinking (KM-PP-BE-NP).

***Stability study***

The stability of KM encapsulated pea protein nanoparticles was monitored over a ~six-month period by measuring the hydrodynamic size and zeta potential of the nanoparticles. 600 mg/L of sodium benzoate and 350 mg/L of potassium sorbate, food grade preservatives were also added to the nano-formulations to extend shelf-life. The nanoparticles were refrigerated (5°C ± 3°C) in glass or plastic containers with a tight seal. Negligible change in size and zeta potential confirmed the stability of nanoparticles for long term storage. In the present study, stability of KM-encapsulated pea protein nanoparticles was assessed over a ~six-month period using both dynamic light scattering (DLS) measurements and gas chromatography–mass spectrometry (GC-MS). This enabled evaluation of temporal consistency in hydrodynamic size, zeta potential, and KM content throughout storage. The DLS size and ZP measurements over a ~six-month period for KM encapsulated Pea Protein Nanoparticles by Berry Extract crosslinking (KM-PP-BE-NP) is shown in SupplementaryTable 1.

**Supplementary Table 1** Stability study of KM encapsulated Pea Protein Nanoparticles Berry Extract crosslinking (KM-PP-BE-NP) by monitoring size and zeta potential (ZP).

| Serial No. | Time  point | DLS Size (nm) | PDI | ZP (mV) |
| --- | --- | --- | --- | --- |
| 1 | 0 | 358 | 0.2 | -12 |
| 2 | 1 week | 301 | 0.2 | -13 |
| 3 | 2 weeks | 306 | 0.2 | -13 |
| 4 | 1 month | 372 | 0.2 | -8 |
| 5 | ~2 months | 314 | 0.2 | -14 |
| 6 | ~3 months | 307 | 0.2 | -13 |
| 7 | 8 months | 334 | 0,2 | -13 |

**Gas chromatography–mass spectrometry (GC-MS) procedure:** The neat Ketone Molecule (KM) was diluted 1,000 times by adding 1000 µL of pyridine. 200 μL of this solution was derivatized with 200 μL BSTFA [N,O-bis(trimethylsilyl)trifluoroacetamide] + 1% TMCS (chlorotrimethylsilane) reagent by incubating at 50 ℃ for an hour. The derivatized samples were then analyzed using a ThermoTRACE 1300 Gas Chromatograph coupled to a Thermo Trace GC/GCQ mass spectrometer with a scan range from 50 to 500 m/z (Thermo Scientific, Inc., Waltham, MA, USA). 1 μL of sample was injected into the GC column with a 35 min run time. Separation was achieved with a temperature program of 40 ℃ as the starting point, then ramped up to 10 ℃/min to 280 ℃ and held at 280 ℃ for 10 min, on a 30 m TG-5SILMS column (Thermo Scientific, 0.25 mm ID, 0.25 um file thickness) and a constant flow of 1 ml/min of helium gas. Using neat KM a calibration curve was generated to quantify KM in the nanoparticles and monitor changes during the stability study. For nanoparticle GC-MS sample preparation, 100 µL of the KM encapsulated Pea Protein Nanoparticles by Berry Extract crosslinking (KM-PP-BE-NP) was dried under nitrogen gas (to remove solvent) and mixed with 100 µL of pyridine. Then 1 μL of sample was injected into the GC column for KM quantification. There was negligible change in the amount of KM measured (~250 mg/ml) at the end of the study in comparison to the beginning, confirming the stability of nanoparticles for long term storage.


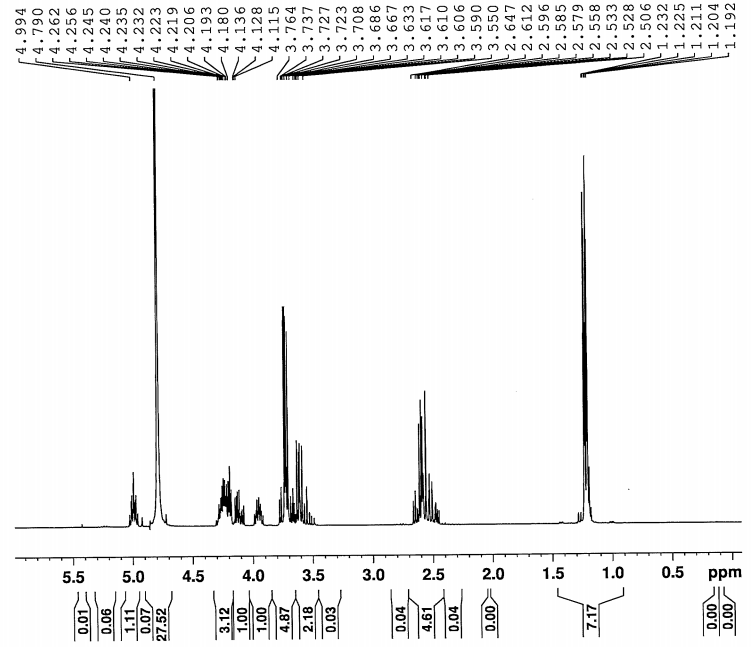


**Supplementary Figure 3** 1H NMR of Ketone Molecule (KM) in D2O.


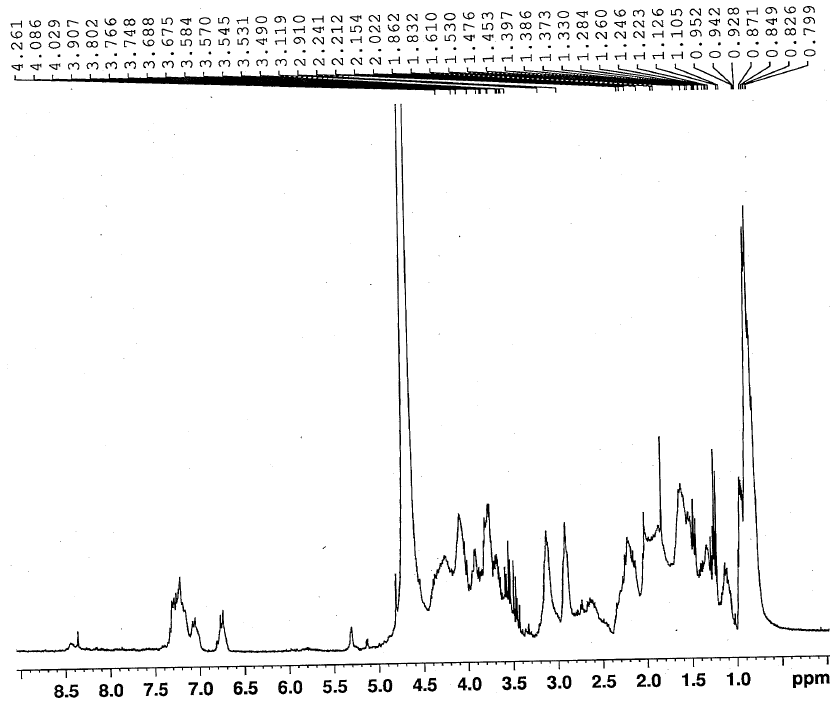


**Supplementary Figure 4** 1H NMR of water soluble Pea Protein (PP) in D2O.


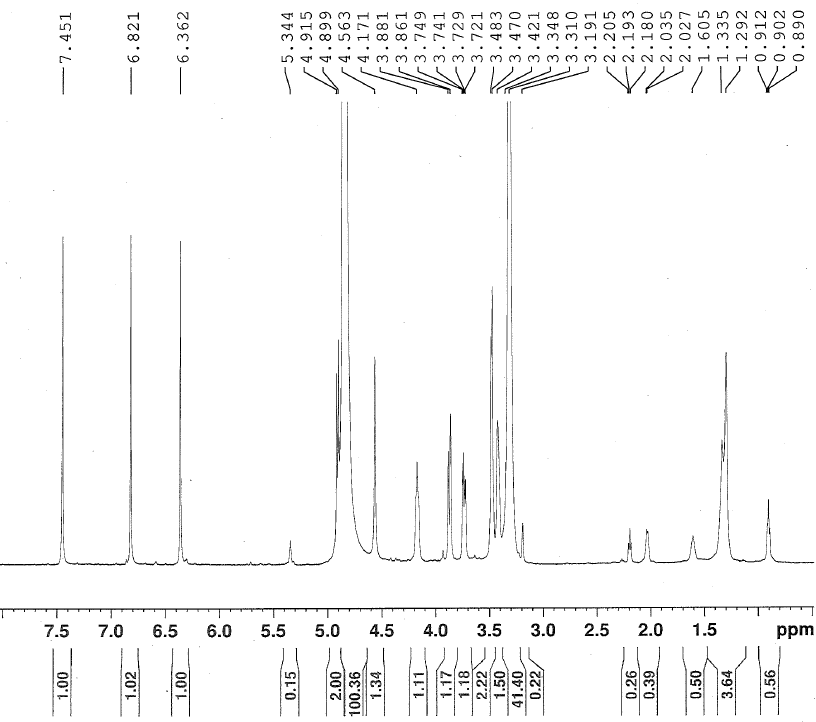


**Supplementary Figure 5** 1H NMR of mangiferin in CD3OD.


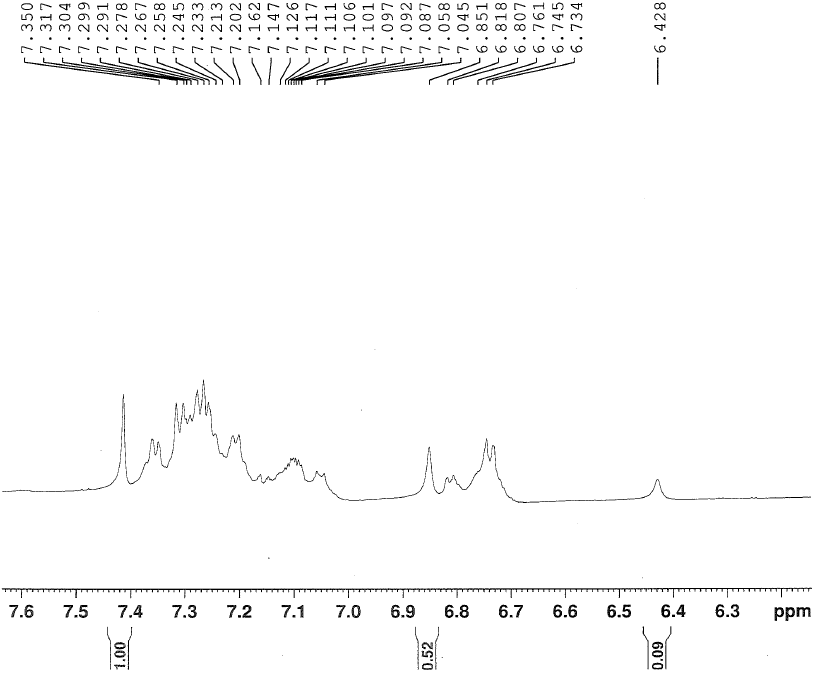


**Supplementary Figure 6** 1H NMR (expanded) of mangiferin and water soluble Pea Protein (PP) reaction mixture in CD3OD/D2O (arrows indicate change in the mangiferin protons).


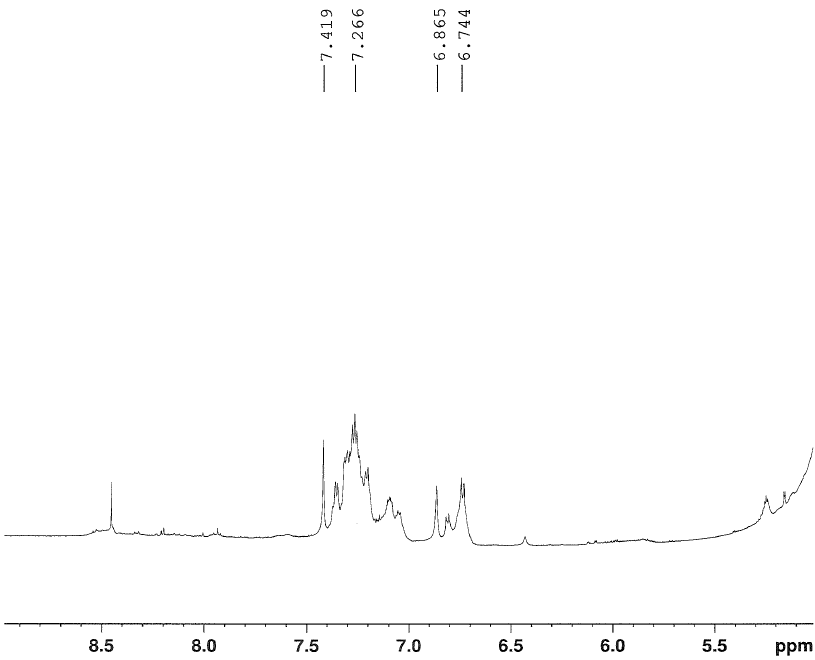


**Supplementary Figure 7** 1H NMR (expanded) of mangiferin, water soluble Pea Protein (PP) and KM reaction mixture in CD3OD/D2O.


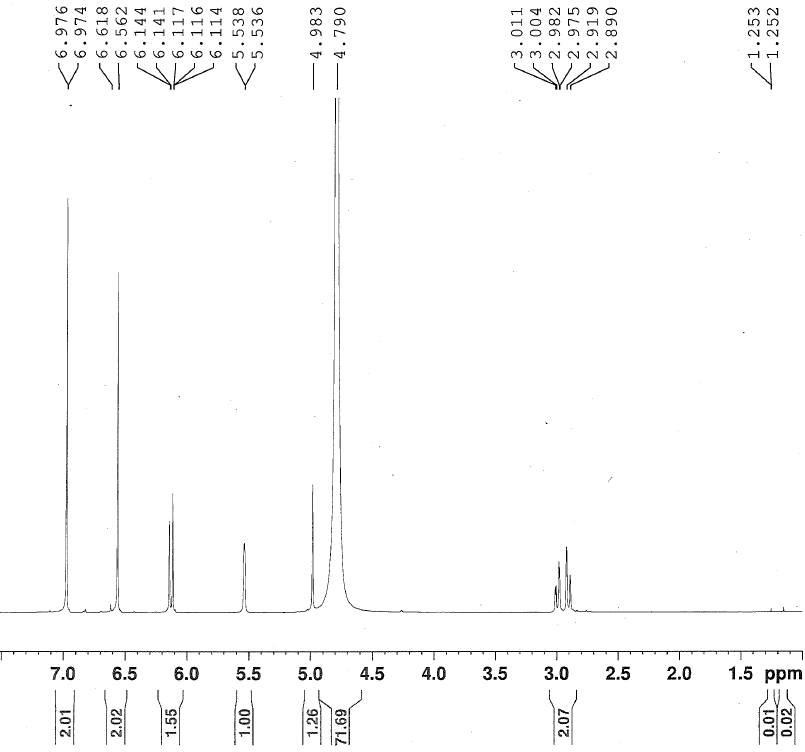


**Supplementary Figure 8** 1H NMR of epigallocatechin gallate (EGCG) in D2O.


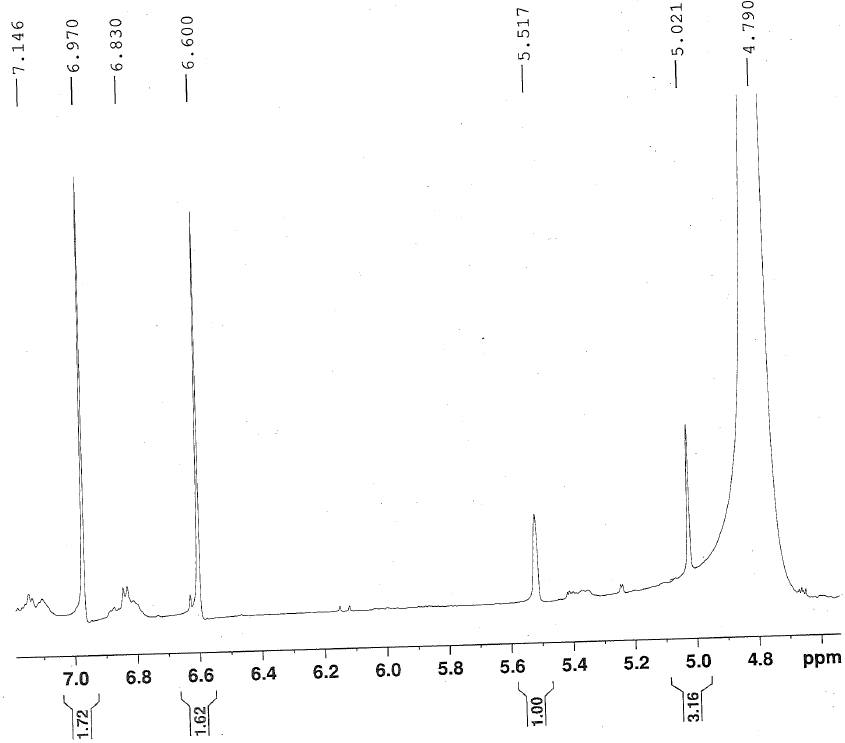


**Supplementary Figure 9** 1H NMR (expanded) of epigallocatechin gallate (EGCG) and water soluble Pea Protein (PP) reaction mixture in D2O (arrow indicate change in EGCG proton).


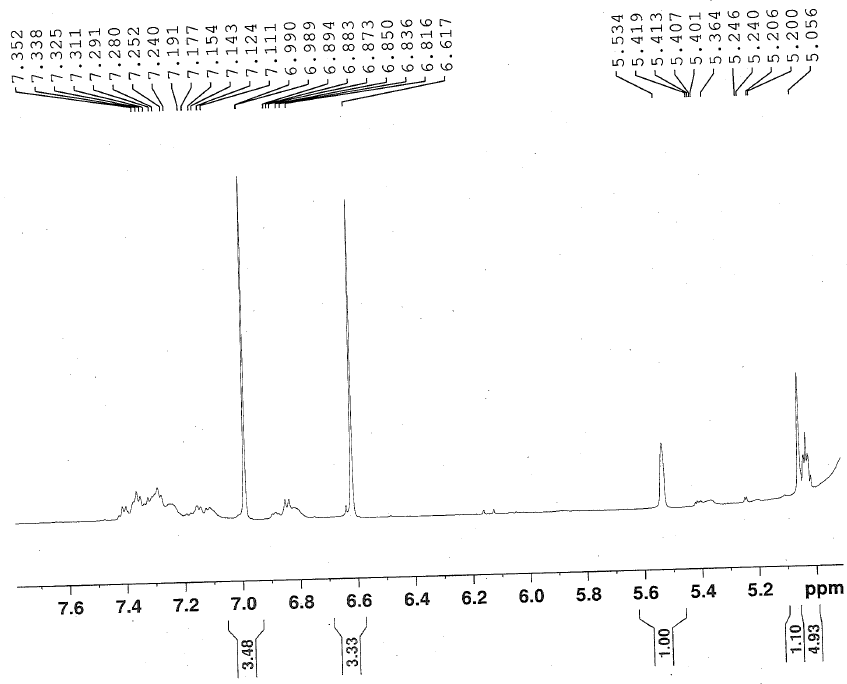


**Supplementary Figure 10** 1H NMR (expanded) of epigallocatechin gallate (EGCG), water soluble Pea Protein (PP) and KM reaction mixture in D2O.


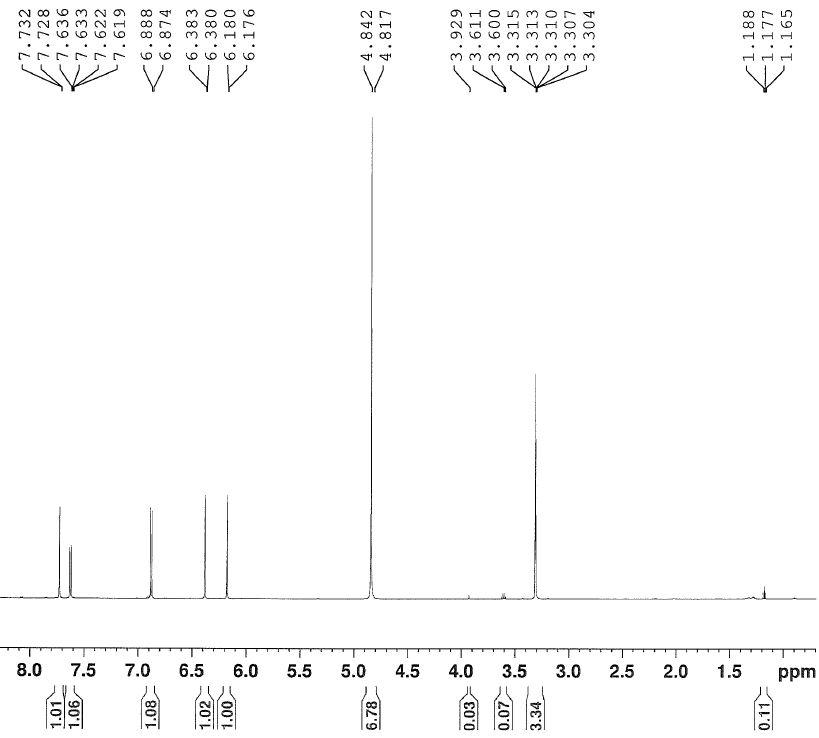


**Supplementary Figure 11** 1H NMR of quercetin in CD3OD.


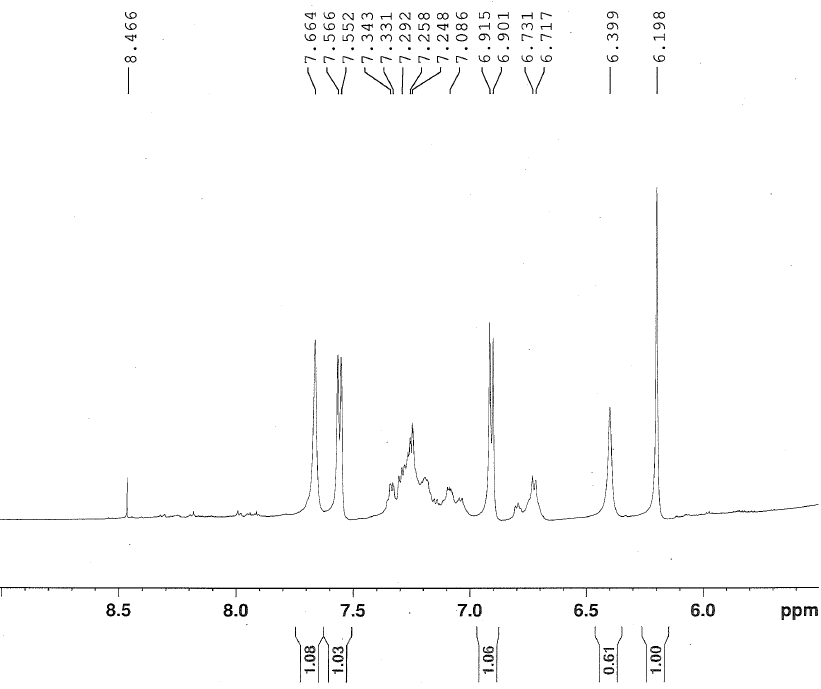


**Supplementary Figure 12** 1H NMR (expanded) of quercetin and water soluble Pea Protein (PP) reaction mixture in CD3OD/D2O (arrow indicate change in quercetin proton).


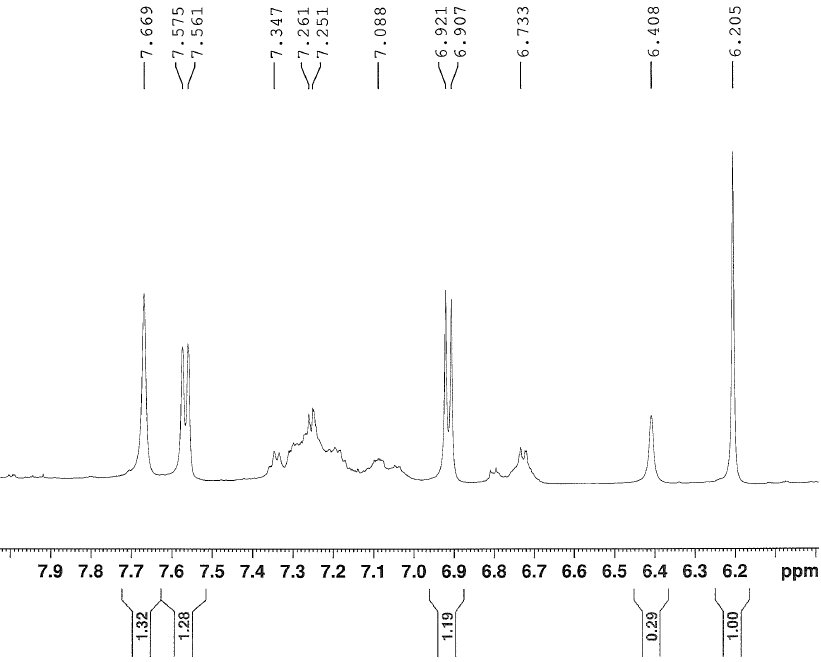


**Supplementary Figure 13** 1H NMR (expanded) of quercetin, water soluble Pea Protein (PP) and KM reaction mixture in CD3OD/D2O.

**Supplementary Figure 14** Keonte Molecule (KM) hydrogen bonding with protein and phytochemical.
